# Supplementary material for: Traditional Chinese Medical Care and Incidence of Stroke in Elderly Patients Treated with Antidiabetic Medications
Source: MDPI journal article supplement (doi:10.3390/ijerph15061267), 2018-06-15

**Supplemental Table S1. The diagnosis codes of ICD-9-CM for patient cohort, exclusion, comorbidity and outcome**

| Categories     | Diseases               | Diagnosis codes of ICD-9-CM                                         |
|----------------|------------------------|---------------------------------------------------------------------|
| Patient cohort | Diabetes               | 250.xx                                                              |
| Exclusion      | Stroke                 | 430.xx-438.xx                                                       |
| Comorbidity    | Ischemic heart disease | 410.xx-414.xx                                                       |
| Comorbidity    | Hypertension           | 401.xx-405.xx                                                       |
| Comorbidity    | Hyperlipidemia         | 272.xx                                                              |
| Comorbidity    | Atrial Fibrillation    | 427.3x                                                              |
| Comorbidity    | Cancer                 | 140.xx-208.xx                                                       |
| Comorbidity    | Chronic kidney disease | 585.xx                                                              |
| Outcome        | Stroke                 | 430.xx-437.xx (hemorrhagic, 430.xx-432.xx; ischemic, 433.xx-437.xx) |

ICD-9-CM indicates International Classification of Diseases, Ninth Revision, Clinical Modification.

**Supplemental Table S2. Sensitivity analysis for hazard ratio of stroke in relation to TCM use defined as at least two claims for TCM outpatient visit in one year after index date**

|                                        | Non-users<br>(n=15379) | TCM users<br>(n=1636 ) |
|----------------------------------------|------------------------|------------------------|
| Person-years of follow-up              | 82363                  | 9090                   |
| All stroke                             |                        |                        |
| No. of events                          | 2077                   | 210                    |
| Incidence rate / 1000 person-years     | 25.2                   | 23.1                   |
| Unadjusted                             | 1                      | 0.94 (0.81-1.09)       |
| Adjusted for age                       | 1                      | 0.97 (0.84-1.12)       |
| Multivariable adjusted*                | 1                      | 0.98 (0.85-1.13)       |
| Ischemic stroke                        |                        |                        |
| No. of events                          | 1836                   | 189                    |
| Incidence rate / 1000 person-years     | 22.3                   | 20.8                   |
| Hazard ratio (95% confidence interval) |                        |                        |
| Unadjusted                             | 1                      | 0.96 (0.83-1.12)       |
| Adjusted for age                       | 1                      | 0.99 (0.85-1.15)       |
| Multivariable adjusted*                | 1                      | 1.00 (0.86-1.16)       |
| Hemorrhagic stroke                     |                        |                        |
| No. of events                          | 266                    | 22                     |
| Incidence rate / 1000 person-years     | 3.2                    | 2.4                    |
| Hazard ratio (95% confidence interval) |                        |                        |
| Unadjusted                             | 1                      | 0.76 (0.49-1.17)       |
| Adjusted for age                       | 1                      | 0.78 (0.51-1.21)       |
| Multivariable adjusted*                | 1                      | 0.79 (0.51-1.23)       |

Abbreviations: CI, confidence interval; TCM, traditional Chinese medicine.

\*Models were adjusted for age, sex, hypertension, hyperlipidemia, atrial fibrillation, ischemic heart disease, chronic kidney disease and number of inpatient visit.

Figure S1. Probability of free from stroke for TCM users and non-users

(a) All stroke

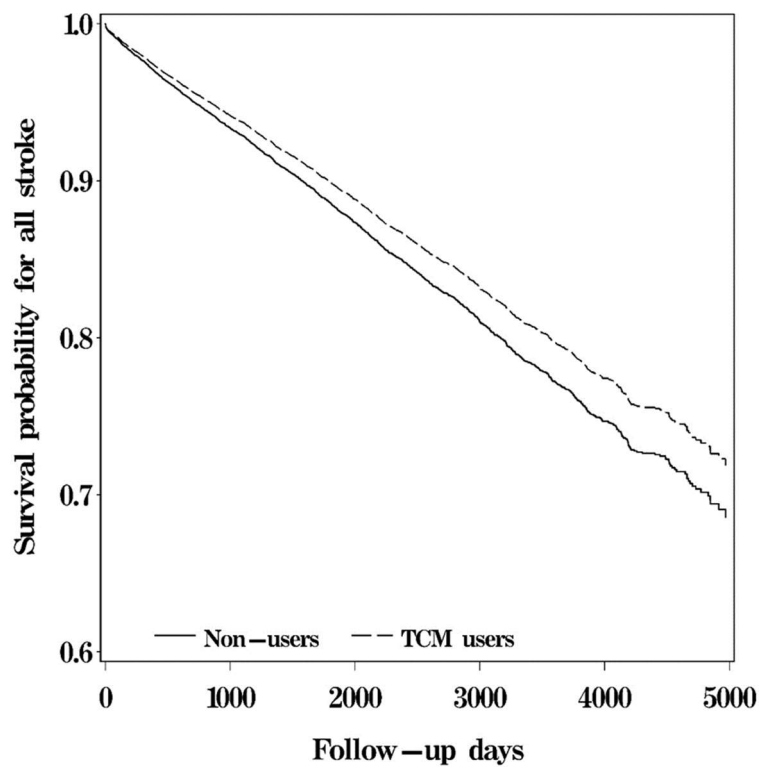

(b) Ischemic stroke

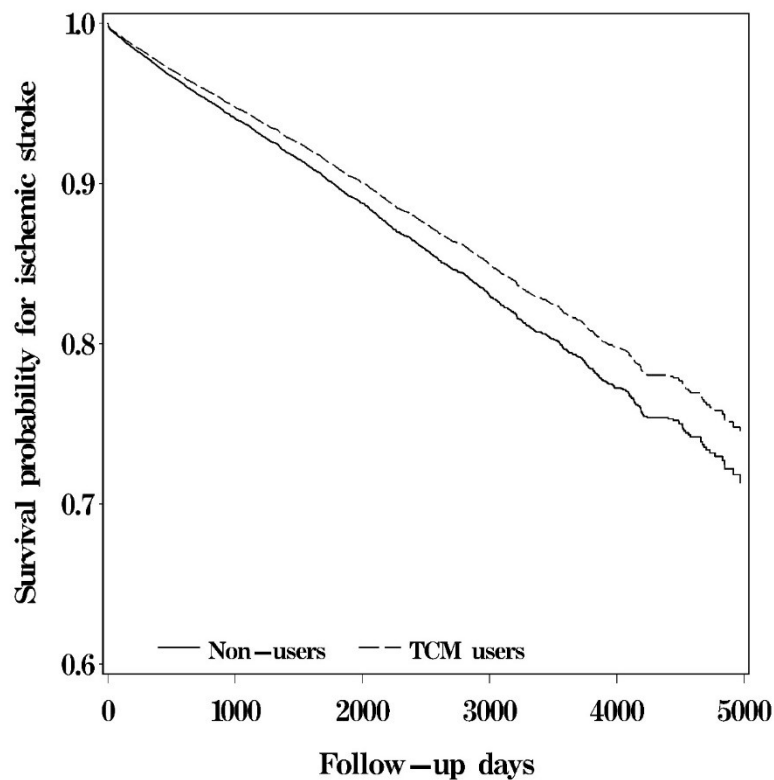

(c) Hemorrhagic stroke

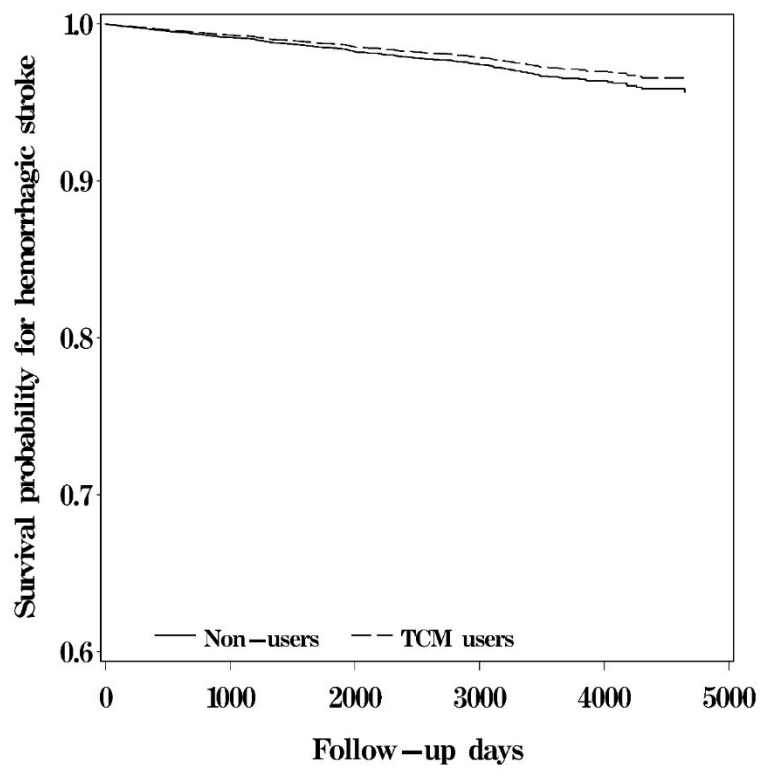

Supplement: s1 [file s1]
